# Supplementary material
Source: PubMed Central journal article supplement (PMC2759608)

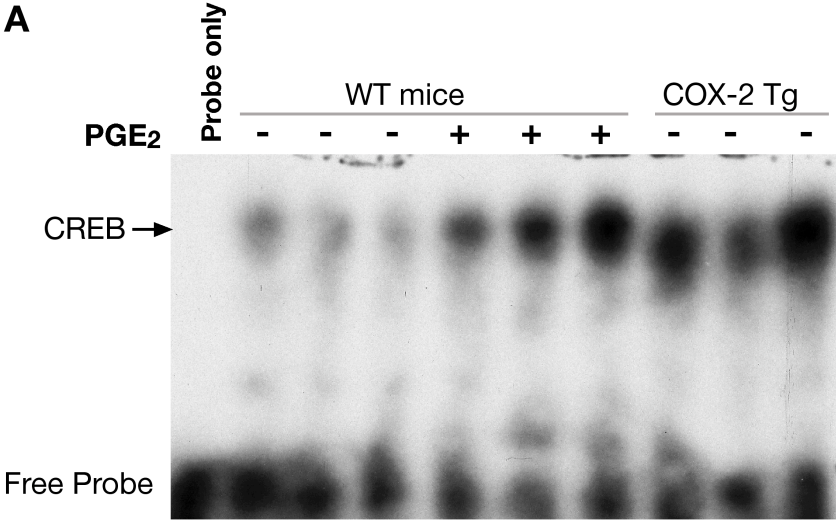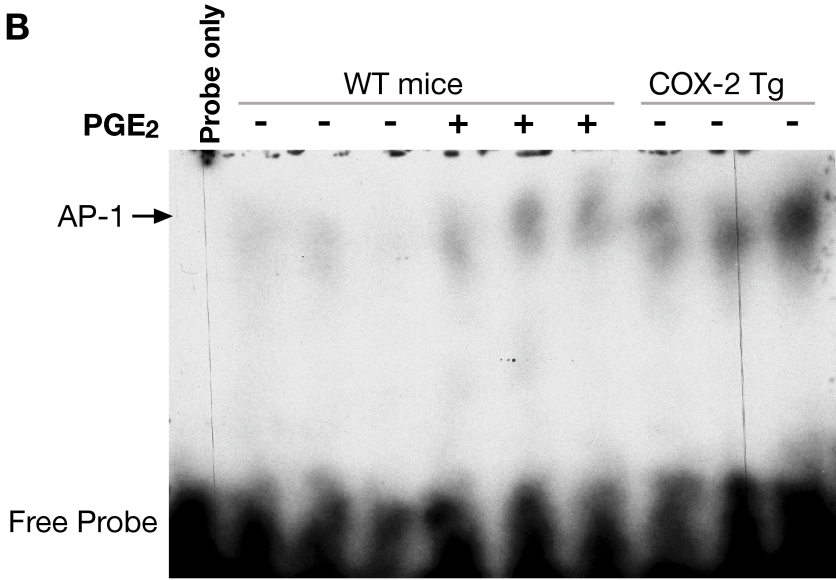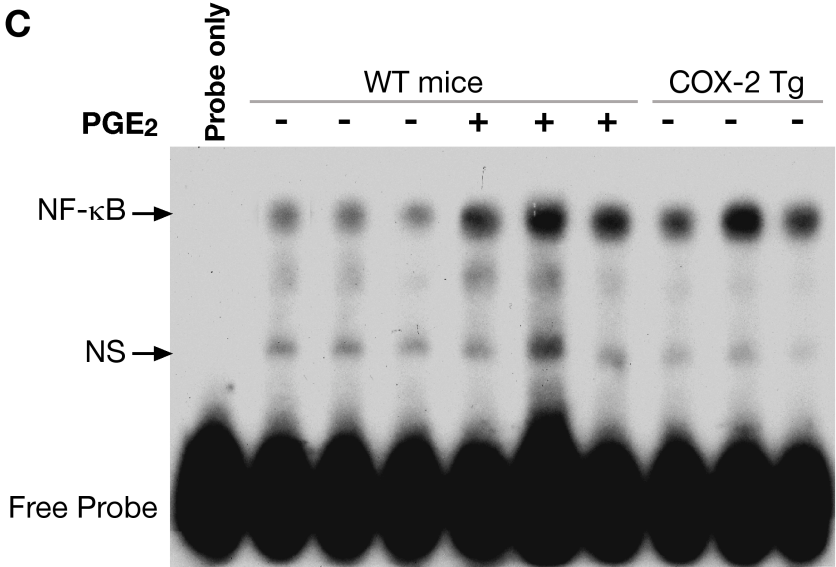

Supplement: NIHMS82828-supplement-FigSup1.pdf [file NIHMS82828-supplement-FigSup1.pdf]
